# 1 MOJITOO: a fast and universal method for integration 2 of multimodal single cell data

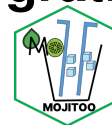

3 Mingbo Cheng<sup>1</sup>, Zhijian Li<sup>1</sup>, and Ivan G. Costa<sup>1,\*</sup>

4 <sup>1</sup>Institute for Computational Genomics, Joint Research Center for Computational Biomedicine, RWTH Aachen  
5 University Medical School, 52074 Aachen, Germany

6 \*ivan.costa@rwth-aachen.de

## 7 ABSTRACT

The advent of multi-modal single cell sequencing techniques have shed new light on molecular mechanisms by simultaneously inspecting transcriptomes, epigenomes and proteomes of the same cell. However, to date, the existing computational approaches for integration of multimodal single cell data are either computationally expensive, require the delineation of parameters or can only be applied to particular modalities.

8 We present a single cell multi-modal integration method, named MOJITOO (**M**ulti-**m**Odal **J**oint **I**ntegra**T**ion of **c**Omp**O**nents). MOJITOO uses canonical correlation analysis for a fast and parameter free detection of a shared representation of cells from multimodal single cell data. Moreover, estimated canonical components can be used for interpretation, i.e. association of modality specific molecular features with the latent space. We evaluate MOJITOO using bi- and tri-modal single cell data sets and show that MOJITOO outperforms existing methods regarding computational requirements, preservation of original latent spaces and clustering.

9

## 10 1 Introduction

11 The technological advances of high-throughput single cell sequencing enable us to characterize cellular heterogeneity  
12 of complex tissues for distinct molecular players of cells such as transcripts, proteins and chromatin<sup>1</sup>. The advent of  
13 multimodal technologies allow us to simultaneously measure two or more modalities at the same cells, i.e. RNA  
14 and open chromatin<sup>2-4</sup>; RNA and protein<sup>5</sup>; and RNA, open chromatin and protein<sup>6,7</sup>. These methods allow us  
15 to access how genetic information is associated at distinct molecular levels, i.e. the effect of DNA accessibility  
16 changes on gene expression or the expression of genes to proteins. However, data produced by each modality has  
17 quite distinct characteristics regarding their numerical values (e.g. low counts for open chromatin and variable count  
18 values for RNA and proteins levels), dimensionality (dozens for proteins, tens of thousands for genes, hundreds of  
19 thousands for open chromatin), and levels of data sparsity<sup>8,9</sup>. These make the integrative analysis of multi-modal  
20 data a challenging task.

21 Here we are interested in the problem of estimating a shared latent space from parallel multiomic approaches,  
22 where two or more modalities are measured in the same cells. A few methods have been proposed for this problem.  
23 These follow two main frameworks: metric learning and latent variable learning. Weighted nearest neighbors  
24 (WNN)<sup>10</sup> and Schema<sup>11</sup> explore, respectively, nearest neighbors and quadratic programming to estimate a single  
25 distance matrix representing the integrated multimodal data. Both approaches explore efficient algorithms, but  
26 do not explicitly provide models associating molecular features to the “latent space”. MOFA<sup>12</sup>, scAI<sup>13</sup>, totalVI<sup>14</sup>

27 and LIGER<sup>15</sup> explore distinct methods for matrix factorization and estimation of shared latent spaces between  
28 modalities. Moreover, estimated matrices can be used for model interpretation, i.e., decomposed matrices can  
29 be used to associate molecular features with the latent space. Overall, these methods have a large number of  
30 free parameters including the size of the latent space (or rank of the low dimensional matrices). These methods  
31 require the optimization of the size of the latent space, which in turn increases computational costs. Moreover,  
32 the implementation of some methods (totalVI<sup>14</sup> and scAI<sup>13</sup>) only allow integration of particular modalities (i.e.,  
33 scRNA-seq and protein abundance for totalVI; scRNA-seq and scATAC-seq for scAI), while LIGER<sup>15</sup> can only be  
34 used for two modalities and a subset of the molecular features need to be common in both modalities.

## 35 **2 Approach**

36 Here, we propose MOJITOO (Multi-mOdal Joint IntegraTion of cOmpOnents), an efficient method that is based on  
37 canonical correlation analysis (CCA) to learn a shared latent space for any single-cell multimodal data protocol. The  
38 canonical components can be interpreted as factors and be used to characterize feature relevance by relating features  
39 across modalities (Fig.1). In contrast to matrix factorization methods, MOJITOO does not require the definition of  
40 parameters such as the rank of the matrix. Furthermore, it provides an approach to estimate the size of the latent  
41 space after a single execution of CCA. MOJITOO is provided as an R package and is compatible with common  
42 single cell pipelines for RNA, proteins (Seurat<sup>10</sup> and ATAC modalities (Signac<sup>16</sup>).

43 We evaluate MOJITOO and competing methods (WNN, MOFA, scAI, LIGER and Schema) in two bi-modal data  
44 sets with RNA and protein measurements<sup>17,18</sup>, two bi-modal data sets with RNA and ATAC-seq measurements<sup>4</sup> and  
45 two tri-modal data sets with RNA, proteins and ATAC-seq measurements<sup>6,19</sup> in regards to their ability to recover a  
46 shared space. The latent spaces are then evaluated with measures regarding the accuracy of clustering (adjusted Rand  
47 index), distance (silhouette score) and structure preservation, i.e. relation between shared space and original space  
48 of individual modalities<sup>20</sup>. Altogether, results show a superior performance of MOJITOO in both computational  
49 requirements and accuracy of estimated latent spaces. Moreover, we show how estimated canonical components can  
50 be used to interpret the underlying single cell data.

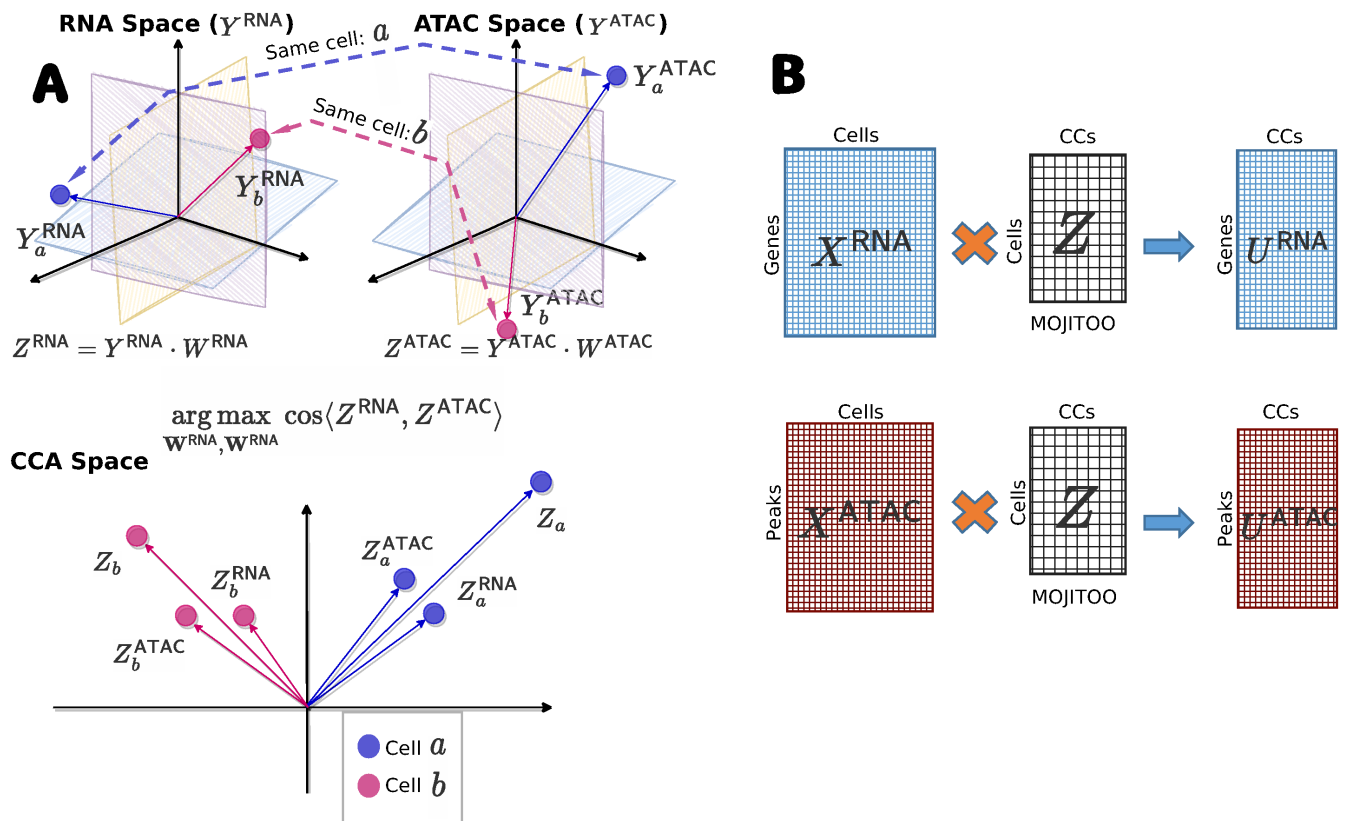

**Figure 1. Schematic MOJITOO.** **A**, MOJITOO receives as input two (or more) dimensional reduced matrices, where each matrix represents a particular molecular modality describing the same cells. In this example, we assume RNA and open chromatin (as measured by ATAC-seq) modalities are given. The main idea of MOJITOO is to use Canonical Correlation Analysis to find a set of canonical vectors  $W^{ATAC}$  and  $W^{RNA}$ . Exploring a geometrical interpretation of CCA, MOJITOO finds canonical vectors such that the cosine similarity between latent dimensions in  $Z^{RNA}$  and  $Z^{ATAC}$  is maximized. A final representation  $Z$  can be obtained by adding the modality specific latent spaces. In the example, we show vectorial representations of two cells ( $a$  and  $b$ ) in both original and latent spaces. **B**, An association between original features for each modality ( $U^{RNA}$  and  $U^{ATAC}$ ) can be obtained by multiplying original data representation per modality ( $X^{RNA}$  and  $X^{ATAC}$ ) with the shared latent space  $Z$ .

## 51 **3 Methods**

### 52 **3.1 MOJITOO**

53 MOJITOO takes as input a set of matrices from  $m$  modalities:

$$\mathcal{X} = \{X^{(1)}, \dots, X^{(m)}\} \quad (1)$$

54 where  $X^{(i)} \in \mathbb{R}^{n \times s^{(i)}}$  represents the data of a particular single cell modality,  $n$  represents the number of cells, and  
 55  $s^{(i)}$  represents the number of features in modality  $i$ . Here, we focus on multimodal data, where the cells are the same  
 56 across matrices and there is no direct relation between the features of the distinct modalities.

#### 57 **3.1.1 Reducing the dimension for each modality**

We first obtain a dimension reduced matrix for each modality independently using a modality-specific approach:

$$Y^{(i)} = f^{(i)}(X^{(i)}) \quad (2)$$

58 where  $Y^{(i)} \in \mathbb{R}^{n \times p^{(i)}}$  represents the low-dimensional matrix for modality  $i$ ,  $p^{(i)}$  represents the number of dimensions  
 59 and  $f^{(i)}$  represents the specific dimension reduction method for this modality. MOJITOO uses latent semantic  
 60 indexing (LSI) for scATAC-seq and principal component analysis (PCA) for other modalities, as is usual in the  
 61 literature<sup>10,16,21</sup>. The reason behind the use of dimension reduction is two fold. First, low-dimensional matrices  
 62 reduce the computing time of the CCA analysis without impacting accuracy even when a small number of dimensions  
 63 are used (30-50). Moreover, it allows to work directly on batch-corrected data, which is usually represented in a  
 64 low-dimensional space<sup>10,22</sup>.

#### 65 **3.1.2 Learning a shared space with canonical correlation analysis with two modalities**

MOJITOO aims to learn a shared latent space  $Z$  from the set of low dimensional matrices  $\mathcal{Y} = \{Y^{(1)}, \dots, Y^{(m)}\}$

$$Z = \text{MOJITOO}(Y^{(1)}, \dots, Y^{(m)}), \quad (3)$$

where  $Z \in \mathbb{R}^{n \times k}$  represents the cells,  $n$  is the number of cells and  $k$  is the dimension of this latent space. When  $\mathcal{Y}$   
 has two modalities, we first use CCA<sup>1</sup> to project the matrices  $Y^{(1)}$  and  $Y^{(2)}$  to vectors  $\mathbf{z}_1^{(1)}$  and  $\mathbf{z}_1^{(2)}$ :

$$\begin{aligned} \mathbf{z}_1^{(1)} &= Y^{(1)} \mathbf{w}_1^{(1)}, \\ \mathbf{z}_1^{(2)} &= Y^{(2)} \mathbf{w}_1^{(2)}, \end{aligned} \quad (4)$$

where  $\mathbf{z}_1^{(1)}$  and  $\mathbf{z}_1^{(2)}$  represent canonical components (CC). The vectors  $\mathbf{w}_1^{(1)}$  and  $\mathbf{w}_1^{(2)}$  can be obtained by solving the  
 following optimization problem:

$$\mathbf{w}_1^{(1)}, \mathbf{w}_1^{(2)} = \arg \max \cos(\mathbf{z}_1^{(1)}, \mathbf{z}_1^{(2)}), \quad (5)$$

<sup>1</sup>This notation is based on a geometrical interpretation of CCA.

where  $\mathbf{w}_1^{(1)} \in \mathbb{R}^{p^{(1)}}$ ,  $\mathbf{w}_1^{(2)} \in \mathbb{R}^{p^{(2)}}$  represent the first canonical weight vectors, and  $\cos(\cdot)$  is the cosine similarity between two vectors  $a$  and  $b$  defined by:

$$\cos(a, b) = \frac{a \cdot b}{|a| \cdot |b|}. \quad (6)$$

This is repeated  $\hat{k} = \min(p^{(1)}, p^{(2)})$  times, such that new canonical vectors are orthogonal to previously estimated vectors. These provide the matrices:

$$\begin{aligned} W^{(1)} &= [\mathbf{w}_1^{(1)}, \dots, \mathbf{w}_{\hat{k}}^{(1)}], \\ W^{(2)} &= [\mathbf{w}_1^{(2)}, \dots, \mathbf{w}_{\hat{k}}^{(2)}]. \end{aligned} \quad (7)$$

These can be used to estimate the modality transformed space as

$$\begin{aligned} Z^{(1)} &= Y^{(1)} \cdot W^{(1)}, \\ Z^{(2)} &= Y^{(2)} \cdot W^{(2)}. \end{aligned} \quad (8)$$

A unique latent space is obtained as

$$Z = Z^{(1)} + Z^{(2)}, \quad (9)$$

66 where  $Z \in \mathbb{R}^{n \times k}$  and  $k$  is the number of canonical variables retained.

67 To further remove the noise from the latent space  $Z$ , we only keep highly correlated canonical components  
68  $z_i^{(1)}$  and  $z_i^{(2)}$  by measuring the Person correlation and using a student's  $t$ -test for significance. The  $p$ -values are  
69 then corrected using BH(Benjamini Hochberg)<sup>23</sup> and only canonical components with adjusted  $p$ -values  $< 0.05$  are  
70 retained.

71 MOJITOO uses an algorithm based on generalized eigenvector decomposition<sup>24</sup> to estimate the canonical  
72 components. MOJITOO has a time complexity of  $\mathcal{O}(\max\{p^{(1)}, p^{(2)}\}^2 \times n)$  for computing covariance matrices and  
73  $\mathcal{O}(\min\{p^{(1)}, p^{(2)}\} \times p^{(1)} \times p^{(2)})$  for the eigenvector decomposition. As  $n$  (number of cells) is usually 100 times  
74 larger than  $p^{(i)}$  (number of reduced dimensions in  $Y^{(i)}$ ) the first term dominates the complexity.

75 Of note, CCA is one of the several steps in the integration algorithm of an earlier version of Seurat<sup>25</sup>. This had  
76 the objective to integrate distinct scRNA-seq experiments and CCA was performed in the common gene space, i.e.  
77 on transposed  $Y^{(i)}$  matrices and the objective was to find matching cells.

### 78 **3.1.3 Learning a shared space for multiple modalities**

79 For the case that  $\mathcal{Y}$  has more than two modalities, we perform the pairwise integration of modalities starting with  
80 the pair with highest dimensionality. The result of this CCA is then used for integration with the next modality. See  
81 algorithm 1 for a brief description, which receives a set of matrices  $\{Y^{(1)}, \dots, Y^{(m)}\}$  with increasing dimensions  
82  $p^{(i)} \geq p^{(i+1)}$  as input. This heuristic algorithm was adopted to avoid the high computational costs of multiple CCA,  
83 which grows exponentially with the number of modalities.

---

**Algorithm 1** Multimodal MOJITOO Algorithm

---

```

procedure MOJITOO( $Y^{(1)}, \dots, Y^{(m)}$ )
   $i \leftarrow 2$ 
   $Z^{(1)} \leftarrow Y^{(1)}$ 
  while  $i \leq m$  do
     $W^{(1)}, W^{(2)} \leftarrow \text{CCA}(Z^{(1)}, Y^{(i)})$ 
     $Z^{(1)} \leftarrow Z^{(1)} \times W^{(1)}$ 
     $Z^{(2)} \leftarrow Y^{(i)} \times W^{(2)}$ 
     $Z \leftarrow Z^{(1)} + Z^{(2)}$ 
     $Z \leftarrow Z[:, 1 : k]$  ▷ only consider significantly correlated dimension
     $Z^{(1)} \leftarrow Z$ 
     $i \leftarrow i + 1$ 
  end while
  return  $Z$ 
end procedure

```

---

84 **3.1.4 Association of molecular features with latent space**

We can use the estimated latent spaces to associate molecular features to the latent space  $Z$ . For example, let  $X^{\text{RNA}} \in \mathbb{R}^{n \times s}$  be the gene expression matrix and  $X^{\text{ATAC}} \in \mathbb{R}^{n \times t}$  be the peak matrix, where  $n$  is the number of cells,  $s$  is the number of genes and  $t$  is the number of peaks. We can obtain a feature associating molecular features to the latent space by

$$\begin{aligned}
 U^{\text{RNA}} &= (X^{\text{RNA}})^T \cdot Z \\
 U^{\text{ATAC}} &= (X^{\text{ATAC}})^T \cdot Z
 \end{aligned}
 \tag{10}$$

85 where  $U^{\text{RNA}} \in \mathbb{R}^{s \times k}$  and  $U^{\text{ATAC}} \in \mathbb{R}^{t \times k}$ . The  $i$ th column of matrix  $U^{\text{RNA}}$  represent the scores of features in the  $i$ th  
 86 canonical component.

87 **3.2 Data sets**

88 We make use of public multimodal data sets with two or tri-modalities in our evaluation. The first data set is  
 89 single cell cite-seq data which measures single cell RNA and surface proteins simultaneously. The human bone  
 90 marrow mononuclear cells (BM-CITE) data set contains full transcriptomes and 25 surface proteins for over 30,672  
 91 cells annotated in 27 cell types<sup>17</sup>. This data was obtained with the “LoadData(“bmcite”)” command from package  
 92 SeuratData. Next, we applied the [pre-processing](#) pipeline. Another CITE-seq data used were the human peripheral  
 93 blood mononuclear cells from lung (LUNG-CITE)<sup>18</sup> with 52 surface proteins. It contains 10,470 cells annotated in  
 94 22 cell types. This data was obtained from [here](#).

95 The next data set contains human peripheral blood mononuclear cells (PBMC-multiome) generated by the 10x  
 96 multiome technology to measure gene expression (scRNA-seq) and chromatin accessibility (scATAC-seq) on the  
 97 same cells. This data contains 11,787 cells with 13 cell types annotated by 10X Genomics. We use the scRNA-seq  
 98 and scATAC-seq count matrices as provided by 10x genomics after processing with the cellranger pipeline obtained  
 99 from the [here](#). We also use a data set based on the SHARE-seq protocol measuring gene expression and chromatin  
 100 accessibility of mouse skin cells (SKIN-SHARE)<sup>4</sup>. This data contains 34,774 cells, which are annotated as 23  
 101 cell types. We obtain the skin scRNA-seq and scATAC-seq counts and fragments files from the Gene Expression

**Table 1.** Major characteristics of multiomics data sets.

| Dataset       | Protocol  | Species | Organ       | Modalities       | #cells | #Cell types | #Features (gene/peak/protein) |
|---------------|-----------|---------|-------------|------------------|--------|-------------|-------------------------------|
| BM-CITE       | CITE-seq  | Human   | Bone Marrow | RNA/protein      | 30,672 | 27          | 17,009/-/25                   |
| LUNG-CITE     | CITE-seq  | Human   | PBMC&Lung   | RNA/protein      | 10,470 | 22          | 33,514/-/52                   |
| PBMC-Multiome | Multiome  | Human   | PBMC        | RNA/ATAC         | 11,787 | 13          | 36,610/108,377/-              |
| Skin-SHARE    | SHARE-seq | Mouse   | Skin        | RNA/ATAC         | 34,774 | 23          | 23,296/344,592/-              |
| PBMC-TEA      | TEA-seq   | Human   | PBMC        | RNA/ATAC/epitope | 25,517 | 12          | 36,601/128,853/47             |
| PBMC-DOGMA    | DOGMA-seq | Human   | PBMC        | RNA/ATAC/protein | 13,763 | 27          | 36,495/68,963/210             |

102 Omnibus under accession number ([GSE140203](#)).

103 A tri-modal data set of human PBMCs is measured with the DOGMA-seq protocol<sup>6</sup>. This provides RNA,  
104 ATAC and epitope sequencing of the same cells (PBMC-DOGMA). We use data under low-loss lysis condition, which  
105 contains 13,763 cells in 27 cell types. We download count matrices as provided by the authors [here](#). A second  
106 tri-modal dataset is based on human PBMCs measured with the TEA-seq protocol<sup>7</sup>. It contains transcripts, epitopes  
107 and chromatin accessibility of 25,517 PBMCs grouped into 12 cell types (PBMC-TEA). For this data set, we obtain  
108 original matrices and combine data from distinct wells from GEO (GSE158013). For scATAC-seq, we obtain an  
109 integrated matrix by combing peaks (allowing an extension of  $\pm 250$ bps). We finally intersect all barcodes from  
110 scRNA-seq, protein and scATAC-seq to obtain matrices in the same cell space. Characteristics of each of the six  
111 data sets are described in Table 1.

### 112 3.2.1 Processing of single cell sequencing data

113 We perform a uniform pre-processing of all previously data sets starting from their count matrices. For scRNA-  
114 seq matrices, we adopt the standard Seurat 4 [pipeline](#). First, we log normalize the data by calling the function  
115 `NormalizeData` with default parameters. Next we use `FindVariableFeatures` to find top 3000 variable features and run  
116 `ScaleData`. Finally, we use `RunPCA` to perform dimension reduction<sup>10</sup> by keeping the first 50 PCs. For scATAC-seq,  
117 we adopt the standard pipeline from [Signac](#)<sup>16</sup>. We first run TF-IDF (term frequency - inverse document frequency)  
118 on the peaks. Next, we use `RunSVD` on the top features calculated by function `FindTopFeatures` with parameter  
119 `min.cutoff='q0'`, which provides an LSI dimension reduced matrix. We keep the first 50 dimensions, but we discard  
120 the first dimension as this is highly correlated to the number of fragments. For protein/epitopes, we adopt the  
121 standard Seurat 4 [pipeline](#)<sup>10</sup>. In short, we call `NormalizeData` with parameters `normalization.method = 'CLR'` and  
122 `margin = 2` followed by `ScaleData` and `RunPCA` with 30 PCs using default parameters. For the PBMC-DOGMA  
123 data, we apply the harmony integration<sup>22</sup> for RNA-seq and epitope data independently to integrate control and  
124 stimulated samples. For scATAC-seq, integration is performed by ignoring the first LSI dimension, which has a  
125 high correlation with the stimulation. We provide these input matrices to MOJITOO and WNN. For MOFA, we  
126 provide the normalized data, but without dimension reduction as in their tutorial (see below). Other competing  
127 methods provide their own functionalities for normalization and dimension reduction, which are used accordingly  
128 (see below). Time and memory requirements of pre-processing data are considered for the benchmarking of the  
129 respective method.

### 130 3.3 Benchmarking of integration methods

131 We use three distinct metrics to measure the accuracy of the methods. The `structure score` measures the  
132 similarity between two latent space structures<sup>20</sup>. It is based on the Pearson correlation of the pairwise Euclidean

133 distance estimated on the shared ( $Z$ ) and latent spaces ( $Y^{(i)}$ ) for each individual modality. This score indicates how  
134 well the shared space is related to the modality and the average values indicate how well integration worked. This  
135 metric is also employed by Schema<sup>11</sup>. We also evaluate the metrics concerning their distance representation using the  
136 *silhouette* score<sup>26</sup>. For this, we use the labels as provided by the cluster of the respective data set. We evaluate  
137 the use of Euclidean distance as ‘distance’ for the *silhouette* score. Finally, we evaluate the performance of  
138 methods regarding clustering. We perform Louvain clustering with varying resolution (parameter from 0.1 to 2.0)  
139 and estimate the adjusted Rand index (ARI) using cell labels<sup>27</sup>.

### 140 **3.4 Execution of competing methods**

#### 141 ***MOFA***

142 MOFA+<sup>12</sup> uses Bayesian group factor analysis and variational inference to decompose individual modalities  
143 simultaneously by estimating a common latent factor matrix  $Z$ , as well as the weights for the transformation of the  
144 modalities to the latent space. MOFA+ includes a procedure to determine the optimal number of factors (dimension  
145 of the latent space) and has several hyper parameters for model regularization, detection of number of factors and  
146 learning rates. We execute MOFA with default parameters and followed their recommendations [tutorial](#) for the  
147 analysis of all data.

#### 148 ***Schema***

149 Schema<sup>11</sup> explores metrics learning to re-weigh modality features through maximizing the agreement with other  
150 modalities. Specifically, it utilizes quadratic programming (QP) to learn a scaling transformation  $u$  for the primary  
151 matrix  $X$  such that pairwise distances of the transformation  $u * x_i$  (where  $*$  is coordinate-wise multiplication, for each  
152  $x_i \in X$ ) are highly correlated in other modalities. Schema has two main parameters: minimum desired correlation  
153 and number of random pairs. We run Schema using default parameters as in [schema tutorial](#).

#### 154 ***Seurat4 WNN***

155 Weighted nearest neighbor (WNN)<sup>10</sup> constructs single unified representation across multiple modalities. It first  
156 creates k-nearest neighbor (KNN) graphs for each modality based on the latent representation of each feature matrix.  
157 Next, it calculates affinities using the exponential kernel between a cell and the average NN for each modality. The  
158 latter is used to weigh cells. WNN has two major free parameters: the number of neighbors and scaling factor of the  
159 neighborhood kernel. We execute WNN, which is part of Seurat4, using default parameters. WNN does not provide  
160 a shared latent space, but we can use the weighted nearest neighbors graph to build a distance metric that can be  
161 used in all benchmarking evaluations.

#### 162 ***scAI***

163 scAI simultaneously decomposes transcriptomic and epigenomic data into multiple biologically relevant factors<sup>28</sup>.  
164 Its framework is similar to MOFA, but it can only cope with two modalities at a time. scAI uses a stability method  
165 to define the rank (size of the latent space) and has three main free parameters used for model regularization. We  
166 execute scAI in only bi-modal with RNA and ATAC-seq datasets with default parameters.

#### 167 ***LIGER***

168 LIGER<sup>29</sup>, which is based on non-negative matrix factorization, was originally proposed for data integration whenever  
169 modalities are in the same feature space. A newer variant of LIGER<sup>15</sup> is able to perform integration, whenever there  
170 is some overlap between the features across modalities (shared features), i.e. protein and RNA expression of the



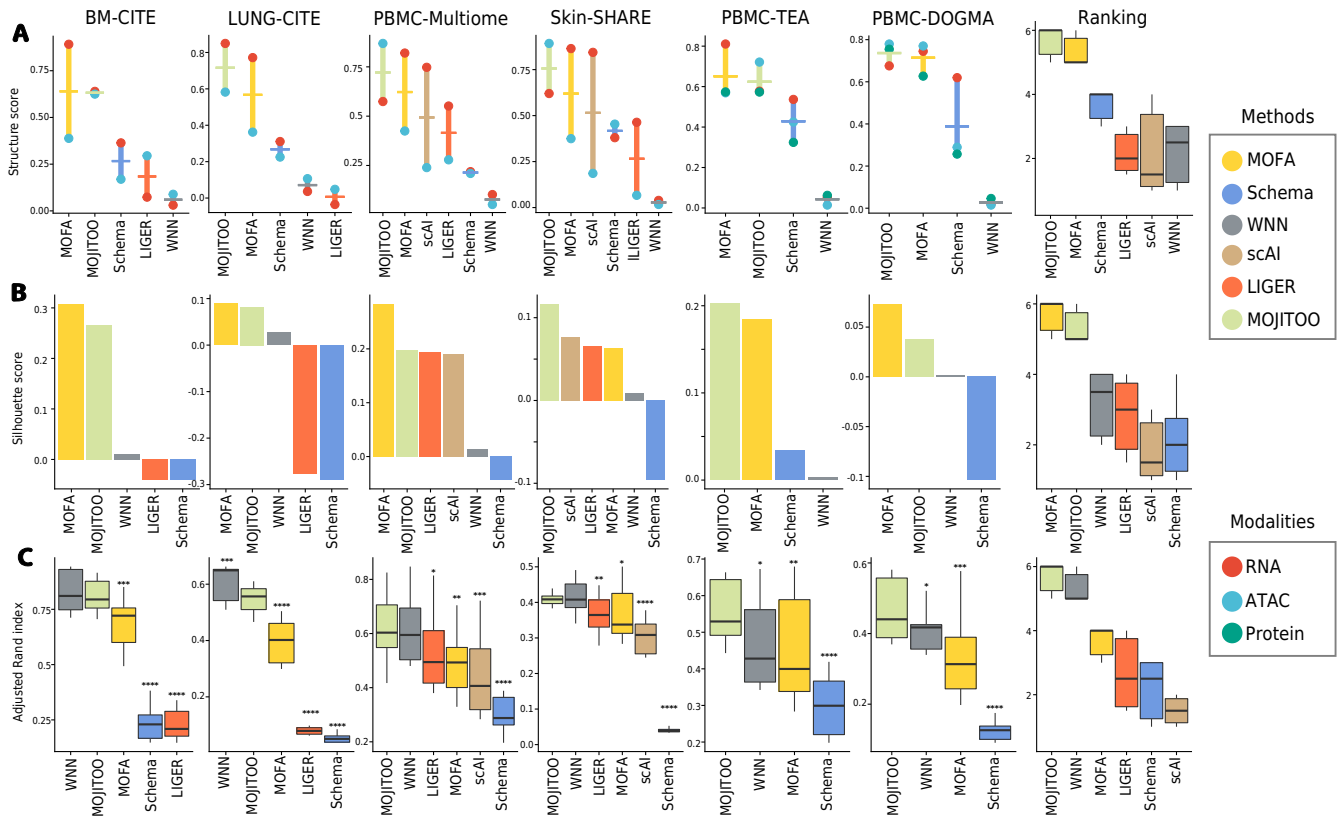

**Figure 2. Benchmarking on data integration methods.** **A**, We show the average (trace) and modality specific structure scores (dots) (y-axis) vs. methods (x-axis) for the six data sets. The last graph shows the combined ranking of the method over all data sets, where the highest rank indicates the best performer. **B**, Barplots showing silhouette score (y-axis) vs. methods (x-axis) for six benchmark data sets. The last plot shows the combined ranked per method. **C**, Boxplots showing ARI scores (y-axis) vs. methods (x-axis) for distinct clustering solutions for all six data-sets. Asterisks indicate  $p$ -values of  $<0.05$  (\*),  $<0.01$  (\*\*),  $<0.001$  (\*\*\*) ,  $<0.0001$  (\*\*\*\*) obtained via  $t$ -test comparing the ARI values of MOJITOO vs. other methods. The last boxplot shows the combined ranking for competing methods.

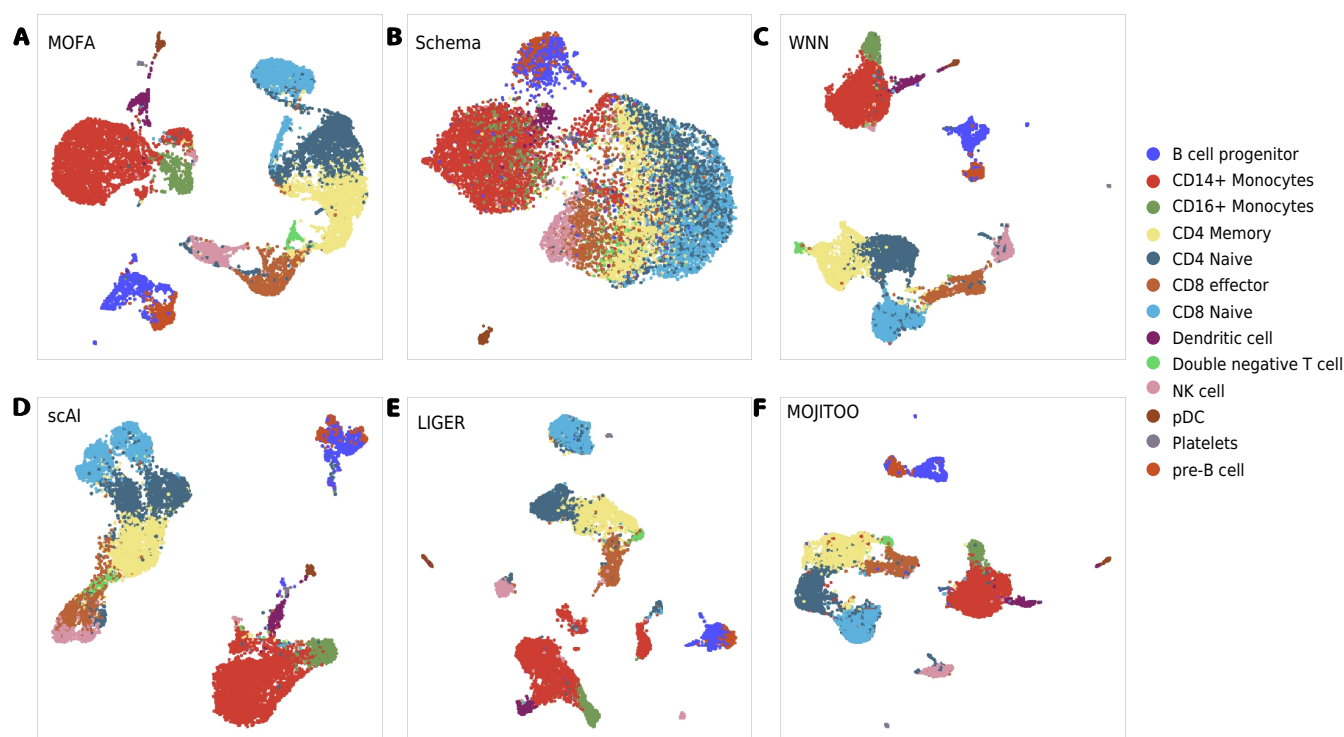

**Figure 3.** A-F, UMAPs showing cell type distribution derived from integration methods on PBMC-multiome dataset.

171 same gene or gene accessibility scores for ATAC-seq. LIGER estimates a gene accessibility (ATAC-seq) matrix by  
172 counting the total number of ATAC-seq reads within the gene body and promoter regions(3kb upstream) for each  
173 gene per cell. An additional unshared feature matrix is further produced by binning the genome into bins of 100,000  
174 bps and counting the overlap of these bins with peaks from the respective data set. LIGER has two major parameters:  
175 a regularization term and the number of factors (dimensions of the latent space). Regions associated to ENCODE  
176 Blacklist regions<sup>30</sup> are removed. Moreover, LIGER can be only executed for bi-modal data sets.

## 177 4 Results

### 178 4.1 Benchmarking of multimodal integration methods

179 We evaluate MOJITTO and competing methods using six publicly available multimodal data sets with two or three  
180 modalities. These data sets have between 10,000 and 35,000 cells, 12 and 27 cell types and 25 to 344,492 features  
181 per modality (Table 1). We compare MOJITTO with MOFA<sup>12</sup>, WNN<sup>10</sup>, Schema<sup>11</sup>, scAI<sup>13</sup> and LIGER<sup>15</sup>. Of note,  
182 some methods (scAI and LIGER) failed to be executed in some conditions, due to their inability to cope with more  
183 than 2 modalities or the lack of raw sequences for some of the evaluated data sets.

184 First, we evaluate algorithms regarding their structure preservation, i.e. the average similarity between the  
185 euclidean distances in the shared space and distances in the space of each modality<sup>20</sup>. Results indicate highest  
186 structure scores for MOJITTO (4 out of 6) followed by MOFA (2 out of 6). A ranking of the structure scores  
187 indicates MOJITTO as the best algorithm followed by MOFA and Schema (Fig. 3A). Interestingly, we observe that  
188 top competing methods (MOFA, Schema) tend to obtain higher structure scores for RNA and that MOJITTO has  
189 a structure score with lower variance across modalities. This suggests that the MOJITTO shared space captures

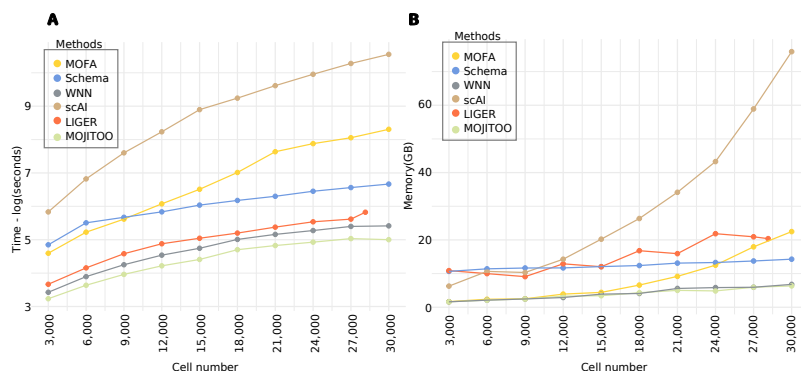

**Figure 4. Time and Memory consumption on the Skin-SHARE.** **A**, Line plots showing elapsed time (log of seconds) for each method (y-axis). **B**, Line plots showing peak memory (Gigabytes) required by each method (y-axis). In both **A-B**, the x-axis shows the number of cells used (randomly sampled) from the Skin-SHARE data.

190 information of all individual modalities more uniformly than MOFA and Schema, while MOFA and Schema have a  
 191 tendency to focus on the RNA modality.

192 Next, we make use of the cell types reported in the original manuscripts introducing the single cell data sets  
 193 as true labels for benchmarking. First, we use these labels to evaluate the silhouette scores by contrasting class  
 194 labels with Euclidean distance matrices estimates on the shared space. Regarding silhouette, MOFA is best in 4  
 195 out of 6 data set, while MOJITTO is best in the other two data sets. MOJITTO obtains second rank in 4 out of 6  
 196 data sets and is ranked second in the overall ranking (Fig. 3B). Finally, we perform Louvain clustering at distinct  
 197 resolutions (0.1 to 2.0) on the shared latent space. We then measure the agreement of clustering results with labels  
 198 using the Adjusted Rand Index (ARI). Notably, MOJITTO obtains highest ARI in 4 data sets, while WNN is best in  
 199 the two CITE-seq data sets (Fig 3C). MOJITTO has the highest overall rank followed by WNN. Examples of low  
 200 dimensional embeddings obtained by distinct integration methods with the PBMC-Multiome data set are provided in  
 201 Fig. 3.

202 A crucial aspect of single cell analysis is the computational resources needed for computation on an increasing  
 203 number of cells. For this, we inspect the time and memory used in the largest data sets in our benchmark (SKIN-  
 204 SHARE). To obtain curves, we down-sample the number of cells from 30,000 to 3,000 (Fig. 4A-B and Tables  
 205 S1- S2). We observe that MOJITTO has the overall lowest computational requirement (2.4 minutes and 6.3 GBs)  
 206 followed closely by WNN (3.74 minutes and 6.8 GBs). MOFA, on the other hand, required up to 67 minutes and  
 207 22.5 GBs for 30,000 cells, while scAI required 637 minutes and 75 GB of memory. These results reflect the fact that  
 208 MOFA and scAI are based on complex matrix factorization algorithms, which require a computationally expensive  
 209 optimization for the number of latent features. Altogether, results indicate MOJITTO has the best recovery of data  
 210 structure and clustering results, while being the fastest and having the lowest memory footprint among all competing  
 211 methods.

## 212 4.2 Canonical vectors support the interpretation of multiome data

213 Additionally, we explore the use of the dimensions of the latent space ( $Z$ ) as factors for interpreting the PBMC  
 214 multiome data. We denote the latent features as canonical components (CC). As shown in Fig. 5, positive or negative  
 215 values for the top CCs discern well all major cell types (Fig. 5). High values of CC1 are associated to myeloid cells  
 216 (CD14+ and CD16+ monocytes and dendritic cells), while negative values are associated to T and NK cells (Fig. 5A).

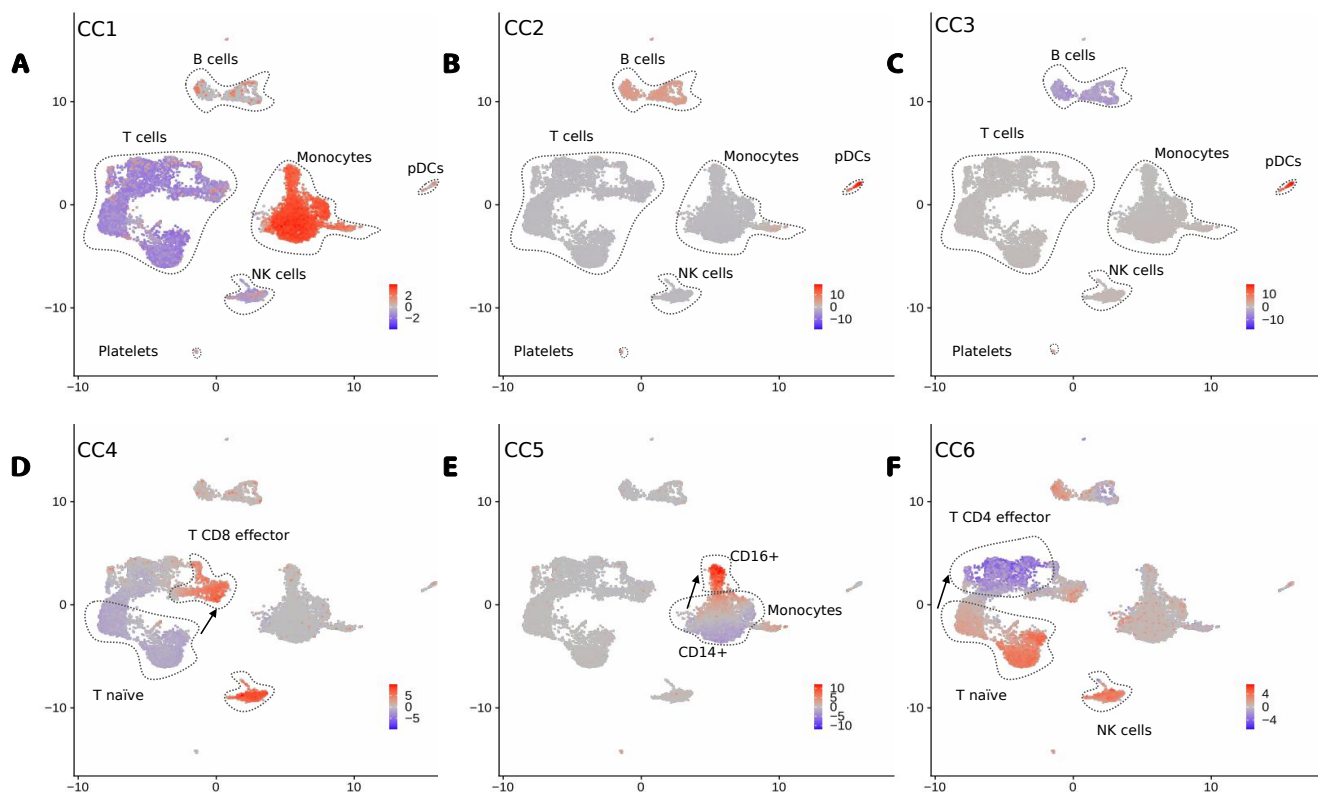

**Figure 5. A-F,** UMAP with the scores of CC1 to CC6. We highlight major cell types (or sub-types) associated to positive or negative CC scores and arrows indicate directions associated to the activation of particular immune cells.

217 CC2 values discern B cell and plasmacytoid dendritic cells (pDC) from other cells, while CC3 differentiates B  
 218 cells from pDCs (Fig. 5B-C). Further CCs capture subtle changes between major cell sub-types (Fig. 5D-E). CC4  
 219 and CC5 capture changes between naive T cells and active T CD8 and active T CD4 cells respectively, while CC5  
 220 captures differences between naive monocytes (CD14+) and activated monocytes (CD16+). Other smaller cell types  
 221 (dendritic cells, platelets, double negative T cells and pre-B and progenitor B cells) can be characterized with further  
 222 CCs (Figure S1).

223 Next, we explore the *U* matrices, which provide values associating molecular features with the latent dimensions  
 224 (CCs). Indeed, the expression of genes with high CC1 values include monocyte genes as *LYN* and *FCN1*, while  
 225 negative CC1 values are associated to T cell genes *BCL11B* and *IL7R* (Fig. 6A). Similarly, we observe that top  
 226 ranked peaks with high or low CC1 scores have monocyte or T cell specific open chromatin. These include regions  
 227 close to the T cell gene *BCL11B* (Fig. 6B). High CC2 value are associated with B cell genes *IGHM* and *BCL11A*,  
 228 while low CC1 genes (*BCBL11B* and *IL32*) are associated with T cells (Fig. 6C). As before, we observe cell specific  
 229 open chromatin patterns on top ranked ATAC-seq peaks associated with high and low CC2 values. Altogether, these  
 230 results indicates that MOJITOO CCs can be used to capture major cell types of peripheral blood cells as well as to  
 231 detect modality specific molecular features associated to these.

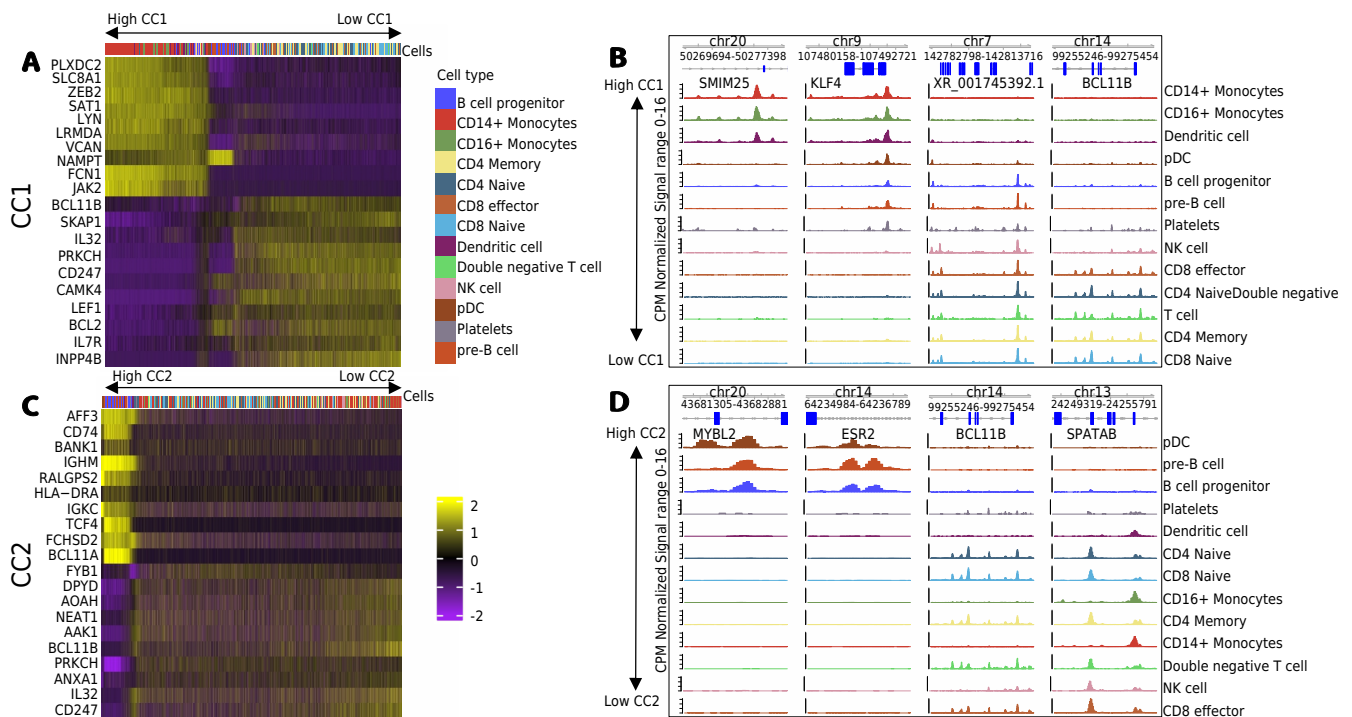

**Figure 6.** **A**, Heatmap with scores for the top 10 positive and negative genes for CC1 (y-axis) vs. cells (x-axis). Cells are ordered by CC1 scores (high to low). **B**, Genome browser tracks with top 2 positive and negative peaks for CC1. Tracks correspond to normalized cell specific pseudo bulk ATAC-seq profiles generated by deeptools<sup>31</sup>. Cell specific tracks are ordered by CC1 score (high to low). **C**, and **D**, show respectively the heatmap of top genes and the genome browser of top peaks for CC2.

## 232 **5 Conclusion**

233 We present here MOJITOO, which is a fast and parameter free method based on canonical correlation analysis for  
234 integration of multimodal single cell data of any protocol. A comprehensive analysis with six bi-modal and tri-modal  
235 multimodal data sets indicates that MOJITOO has the best performance regarding the preservation of the structures  
236 across modalities and the recovery of clusters, while it is ranked second regarding distance representation. Moreover,  
237 MOJITOO has the lowest time and memory requirements requiring 2.5 minutes and 6.4GB in the largest data set  
238 with 30.000 cells. WNN, which is the standard method for integration in Seurat, performed well on the clustering  
239 problem (2nd after MOJITOO) and had a low computational time, but had a poor performance in the structure  
240 preservation and silhouette scores. Moreover, WNN, which outputs a distance matrix on the shared space, does  
241 not provide latent features as MOJITOO or MOFA. MOFA performed well on the structure recovery and distance  
242 representation, but did not perform well on clustering and had one of the highest computational requirements being  
243 20 times slower than MOJITOO and WNN and requiring 3.5 times more memory. The performance of MOFA  
244 reflects its model complexity, which includes the optimization of the size of the latent space. MOJITTO, on the  
245 other hand, explores the fact that CCA can be resolved within a single run of an eigen-decomposition and the choice  
246 of the final latent space can be performed as a posthoc step without the need of further model estimations.

247 Another interesting result is the fact the structure preservation scores are more uniform across modalities for  
248 MOJITOO than competing methods, while runner-up methods (MOFA and Schema) obtained highest scores for the  
249 RNA modality. This is possibly rooted on the analytical frameworks of these methods. CCA analysis explicitly finds  
250 canonical vectors with high correlation across modalities, while matrix factorization methods (MOFA and Schema)  
251 do not explicitly guarantee factors are uniformly well represented across modalities.

252 Finally, we highlight how a simple inspection of CCA derived latent spaces supports the biological interpretation  
253 and detection of relevant molecular features, as exemplified in the multiome PBMC data set. Future work includes  
254 further exploring the interpretability of MOJITOO, for example, by finding associations between molecular features  
255 across modalities as gene to peak links<sup>21</sup>. Another interesting topic is to investigate if differences in the modality  
256 specific space for given cell indicates biological properties of those. For example, in the Skin SHARE-seq data<sup>4</sup>,  
257 authors show that cells with changes in chromatin preceding changes in gene expression indicates cell differentiation.

## 258 **Code availability**

259 Code and documentation are available on github: <https://github.com/CostaLab/MOJITOO>

## 260 **Acknowledgements**

261 This project has been funded by the German Research Foundation (DFG) (project GE 2811/3-2) and the E:MED  
262 Consortia Fibromap funded by the German Ministry of Education and Science (BMBF).

## 263 **Competing interests**

264 The authors declare no competing interests.

## 265 **References**

- 266 **1.** Efremova, M. & Teichmann, S. A. Computational methods for single-cell omics across modalities. *Nat. Methods*  
267 **17**, 14–17, DOI: [10.1038/s41592-019-0692-4](https://doi.org/10.1038/s41592-019-0692-4) (2020).

- 268 **2.** Cao, J. *et al.* Joint profiling of chromatin accessibility and gene expression in thousands of single cells. *Science*  
269 **361**, 1380–1385 (2018).
- 270 **3.** Hu, Y. *et al.* sccat-seq: single-cell identification and quantification of mrna isoforms by cost-effective short-read  
271 sequencing of cap and tail. *bioRxiv* (2019).
- 272 **4.** Ma, S. *et al.* Chromatin potential identified by shared single-cell profiling of rna and chromatin. *Cell* **183**,  
273 1103–1116 (2020).
- 274 **5.** Stoeckius, M. *et al.* Simultaneous epitope and transcriptome measurement in single cells. *Nat. methods* **14**,  
275 865–868 (2017).
- 276 **6.** Mimitou, E. P. *et al.* Scalable, multimodal profiling of chromatin accessibility, gene expression and protein  
277 levels in single cells. *Nat. Biotechnol.* 1–13 (2021).
- 278 **7.** Swanson, E. *et al.* Simultaneous trimodal single-cell measurement of transcripts, epitopes, and chromatin  
279 accessibility using tea-seq. *Elife* **10**, e63632 (2021).
- 280 **8.** Argelaguet, R., Cuomo, A. S., Stegle, O. & Marioni, J. C. Computational principles and challenges in single-cell  
281 data integration. *Nat. Biotechnol.* **39**, 1202–1215, DOI: [10.1038/s41587-021-00895-7](https://doi.org/10.1038/s41587-021-00895-7) (2021).
- 282 **9.** Li, Z. *et al.* Chromatin-accessibility estimation from single-cell atac-seq data with scopen. *Nat. communications*  
283 **12**, 1–14 (2021).
- 284 **10.** Hao, Y. *et al.* Integrated analysis of multimodal single-cell data. *Cell* (2021).
- 285 **11.** Singh, R., Hie, B. L., Narayan, A. & Berger, B. Schema: metric learning enables interpretable synthesis of  
286 heterogeneous single-cell modalities. *Genome Biol.* **22**, 1–24 (2021).
- 287 **12.** Argelaguet, R. *et al.* Mofa+: a statistical framework for comprehensive integration of multi-modal single-cell  
288 data. *Genome biology* **21**, 1–17 (2020).
- 289 **13.** Jin, S., Zhang, L. & Nie, Q. scai: an unsupervised approach for the integrative analysis of parallel single-cell  
290 transcriptomic and epigenomic profiles. *Genome biology* **21**, 1–19 (2020).
- 291 **14.** Gayoso, A. *et al.* Joint probabilistic modeling of single-cell multi-omic data with totalvi. *Nat. Methods* **18**,  
292 272–282 (2021).
- 293 **15.** Kriebel, A. R. & Welch, J. D. Nonnegative matrix factorization integrates single-cell multi-omic datasets with  
294 partially overlapping features. *bioRxiv* (2021).
- 295 **16.** Stuart, T., Srivastava, A., Madad, S., Lareau, C. A. & Satija, R. Single-cell chromatin state analysis with signac.  
296 *Nat. Methods* 1–9 (2021).
- 297 **17.** Stuart, T., Srivastava, A., Lareau, C. & Satija, R. Multimodal single-cell chromatin analysis with signac. *BioRxiv*  
298 (2020).
- 299 **18.** Buus, T. B. *et al.* Improving oligo-conjugated antibody signal in multimodal single-cell analysis. *Elife* **10**,  
300 e61973 (2021).
- 301 **19.** Swanson, E. *et al.* Tea-seq: a trimodal assay for integrated single cell measurement of transcription, epitopes,  
302 and chromatin accessibility. *bioRxiv* (2020).
- 303 **20.** Jain, M. S. *et al.* Multimap: Dimensionality reduction and integration of multimodal data. *bioRxiv* (2021).

- 304 **21.** Granja, J. M. *et al.* Archr is a scalable software package for integrative single-cell chromatin accessibility  
305 analysis. *Nat. genetics* **53**, 403–411 (2021).
- 306 **22.** Korsunsky, I. *et al.* Fast, sensitive and accurate integration of single-cell data with harmony. *Nat. methods* **16**,  
307 1289–1296 (2019).
- 308 **23.** Benjamini, Y. & Hochberg, Y. Controlling the false discovery rate: a practical and powerful approach to multiple  
309 testing. *J. Royal statistical society: series B (Methodological)* **57**, 289–300 (1995).
- 310 **24.** Ramsay, J. & Silverman, B. *Functional Data Analysis* (Springer, 1997).
- 311 **25.** Butler, A., Hoffman, P., Smibert, P., Papalexi, E. & Satija, R. Integrating single-cell transcriptomic data across  
312 different conditions, technologies, and species. *Nat. biotechnology* **36**, 411–420 (2018).
- 313 **26.** Rousseeuw, P. J. Silhouettes: a graphical aid to the interpretation and validation of cluster analysis. *J.*  
314 *computational applied mathematics* **20**, 53–65 (1987).
- 315 **27.** Hubert, L. & Arabie, P. Comparing partitions. *J. classification* **2**, 193–218 (1985).
- 316 **28.** Clark, S. J. *et al.* scnm-seq enables joint profiling of chromatin accessibility dna methylation and transcription  
317 in single cells. *Nat. communications* **9**, 1–9 (2018).
- 318 **29.** Welch, J. D. *et al.* Single-cell multi-omic integration compares and contrasts features of brain cell identity. *Cell*  
319 **177**, 1873–1887 (2019).
- 320 **30.** Amemiya, H. M., Kundaje, A. & Boyle, A. P. The encode blacklist: identification of problematic regions of the  
321 genome. *Sci. reports* **9**, 1–5 (2019).
- 322 **31.** Ramírez, F. *et al.* deepTools2: a next generation web server for deep-sequencing data analysis. *Nucleic acids*  
323 *research* **44**, W160–W165 (2016).



## 324 6 Supplement

**Table S1.** Benchmarking experiments on SKIN-SHARE data set (time elapsed in minutes). Of note LIGER could only be executed with up to 28,147 cells.

| cells  | LIGER | MOFA  | MOJITOO | scAI   | Schema | WNN  |
|--------|-------|-------|---------|--------|--------|------|
| 3,000  | 0.65  | 1.65  | 0.42    | 5.69   | 2.12   | 0.51 |
| 6,000  | 1.06  | 3.10  | 0.63    | 15.29  | 4.10   | 0.82 |
| 9,000  | 1.63  | 4.58  | 0.88    | 33.37  | 4.84   | 1.17 |
| 12,000 | 2.19  | 7.24  | 1.13    | 62.68  | 5.70   | 1.56 |
| 15,000 | 2.59  | 11.20 | 1.37    | 121.74 | 6.98   | 1.92 |
| 18,000 | 3.02  | 18.53 | 1.83    | 171.82 | 8.02   | 2.50 |
| 21,000 | 3.61  | 34.51 | 2.08    | 249.61 | 9.08   | 2.90 |
| 24,000 | 4.23  | 43.96 | 2.30    | 350.98 | 10.56  | 3.26 |
| 27,000 | 4.58  | 52.47 | 2.56    | 485.13 | 11.79  | 3.68 |
| 30,000 | -     | 67.53 | 2.48    | 637.52 | 13.09  | 3.74 |

**Table S2.** Peak memory consumption in gigabytes. Of note LIGER could only be executed with up to 28,147 cells.

| cells  | LIGER | MOFA  | MOJITOO | scAI  | Schema | WNN  |
|--------|-------|-------|---------|-------|--------|------|
| 3,000  | 10.88 | 1.66  | 1.61    | 6.27  | 10.66  | 1.61 |
| 6,000  | 9.99  | 2.37  | 2.11    | 10.65 | 11.41  | 2.11 |
| 9,000  | 9.09  | 2.51  | 2.46    | 10.32 | 11.66  | 2.46 |
| 12,000 | 12.90 | 3.90  | 3.28    | 14.26 | 11.68  | 2.89 |
| 15,000 | 12.04 | 4.42  | 3.43    | 20.22 | 12.07  | 3.88 |
| 18,000 | 16.80 | 6.58  | 4.31    | 26.36 | 12.39  | 4.09 |
| 21,000 | 15.92 | 9.17  | 5.01    | 34.14 | 13.11  | 5.58 |
| 24,000 | 21.85 | 12.49 | 4.85    | 43.27 | 13.29  | 5.84 |
| 27,000 | 20.93 | 17.94 | 5.94    | 58.91 | 13.74  | 5.93 |
| 30,000 | -     | 22.47 | 6.34    | 75.92 | 14.28  | 6.79 |

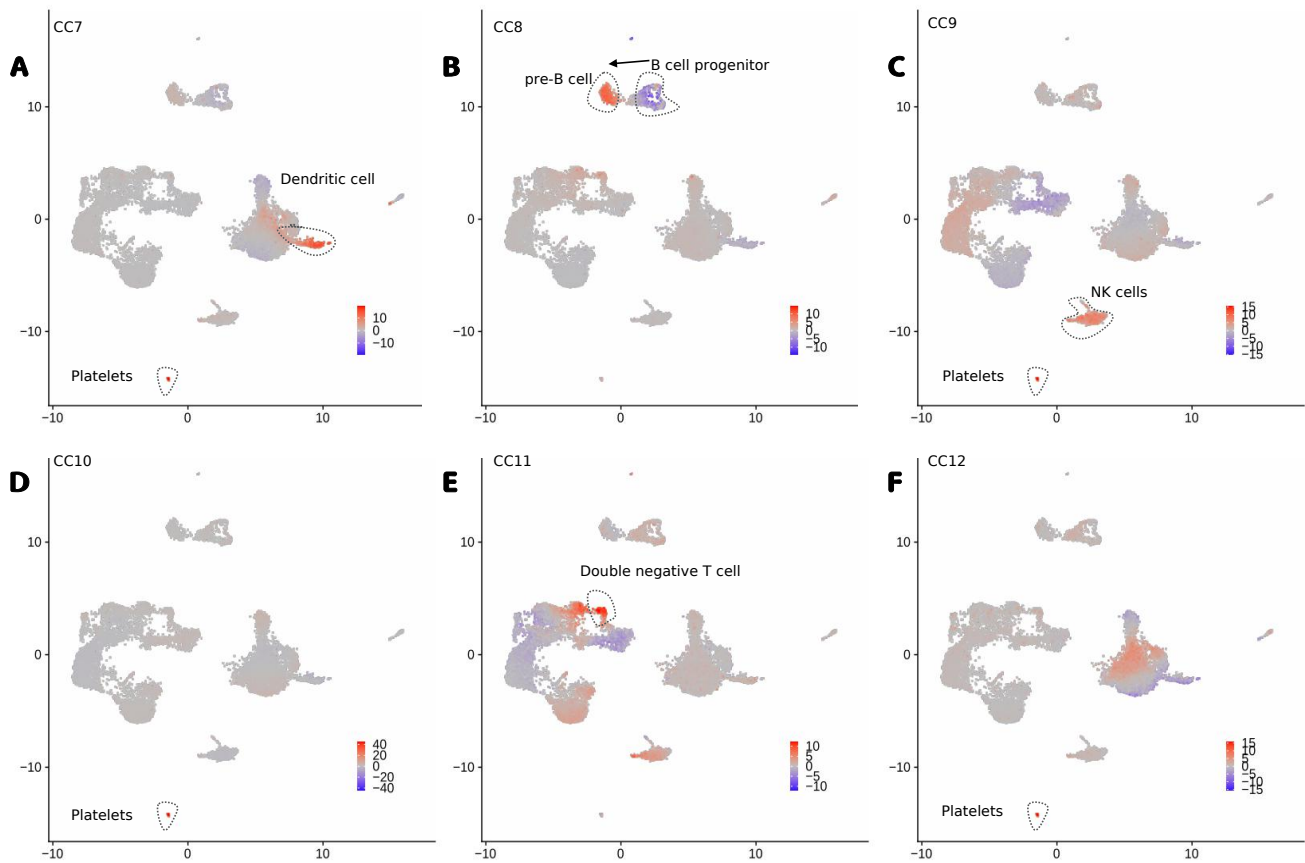

**Figure S1. A-F,** UMAP with the scores of CC7 to CC12. We highlight major cell types associated to positive or negative CC scores and the arrow represents a potential differentiation process.
